# Supplementary material
Source: Springer Nature journal article supplement (https://www.springermedizin.de/resource/supplementary/12936_2009_1005_MOESM2_ESM.pdf/9548760)

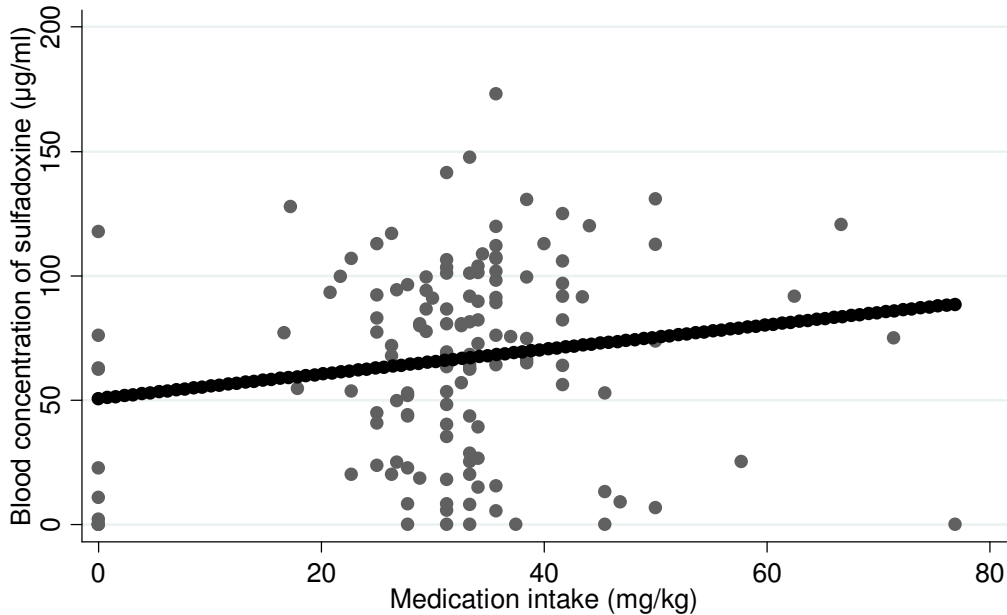

- Blood concentration of sulfadoxine per medication intake
- Fitted values

Supplement: MOESM2 [file 9548760]
